# Supplementary material for: Carcinoembryonic antigen is a sialyl Lewis x/a carrier and an E-selectin ligand in non-small cell lung cancer
Source: PubMed Central journal article supplement — Int J Oncol. 2019 Sep 26;55(5):1033–48. doi: 10.3892/ijo.2019.4886 (PMC6776192; doi:10.3892/ijo.2019.4886), 2019-09-26
Supplement: Supplementary_Data.pdf [file Supplementary_Data.pdf]

Figure S1. Association between gene expression and clinical features. The T/N expression ratios of *FUT3*, *FUT4*, *FUT6*, *FUT7*, *ST3GAL3*, *ST3GAL4* and *ST3GAL6* were separated according to the histological type, stage, gender, age, metastasis, overall survival and smoking habits of the patients. Only significant differences are presented. (A) *FUT3* expression ratio according to the histological type. AC, n=14; SCC, n=4. (B) *FUT7* expression ratio according to patient gender. Female, n=4; male, n=10. (C) *FUT6* expression ratio according to patient smoking habits. Smoker, n=8; non-smoker, n=6. Box-and-whisker plots represent median values, and lower and upper quartiles (boxes), ranges and all values for each group (black dots).  $0.05 < P < 0.1$ , marginally significant; \* $P < 0.05$ . AC, adenocarcinoma; FUT, fucosyltransferase; SCC, squamous cell carcinoma; ST3GAL,  $\alpha$ 2,3-sialyltransferase.

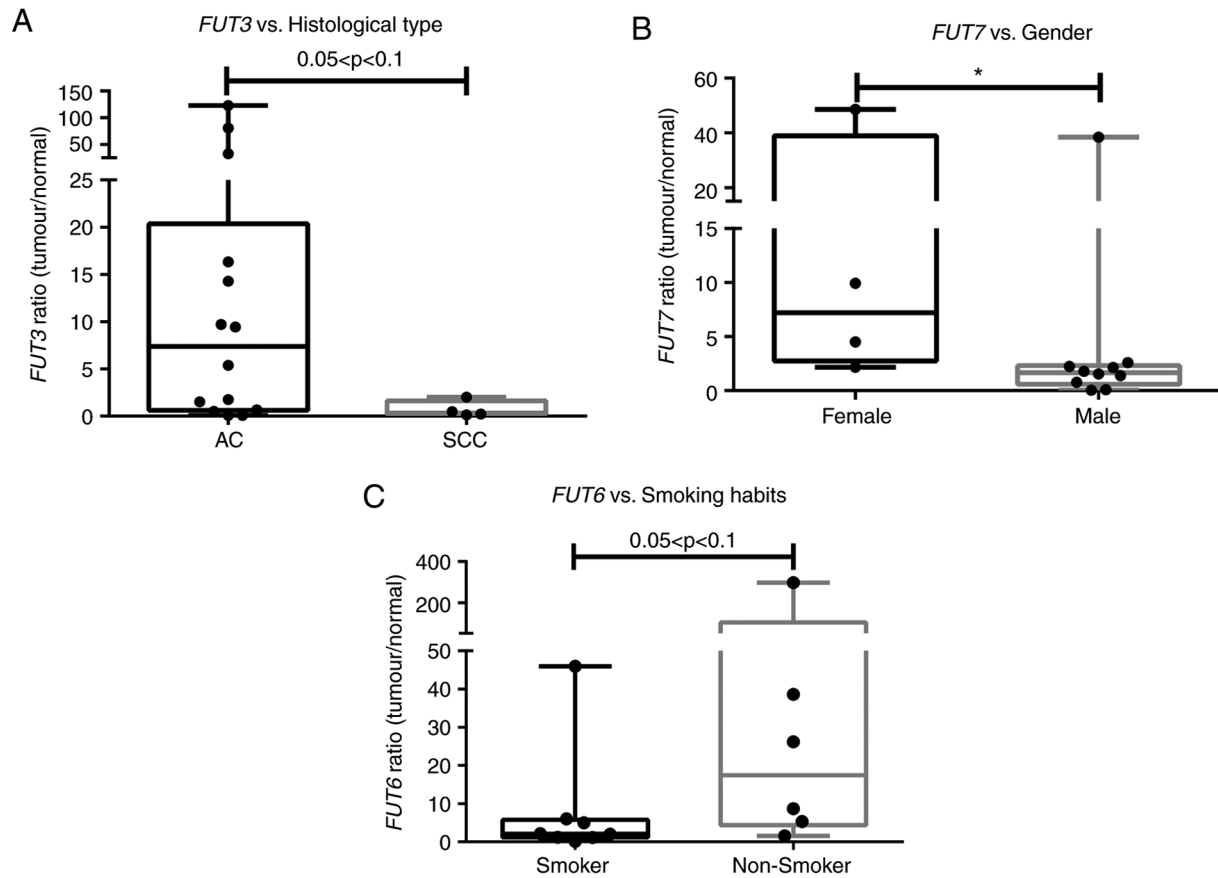

Figure S2. E-selectin expression in CHO-mock and CHO-E cells. Representative flow cytometry histograms for the expression of E-selectin in CHO-mock cells and CHO-E cells, after staining with anti-E-selectin monoclonal antibody (clone 68-5H11). The dotted line represents cells labelled with isotype control. CHO, Chinese hamster ovary cells; CHO-E, E-selectin-expressing CHO; CHO-mock, empty vector-transfected CHO.

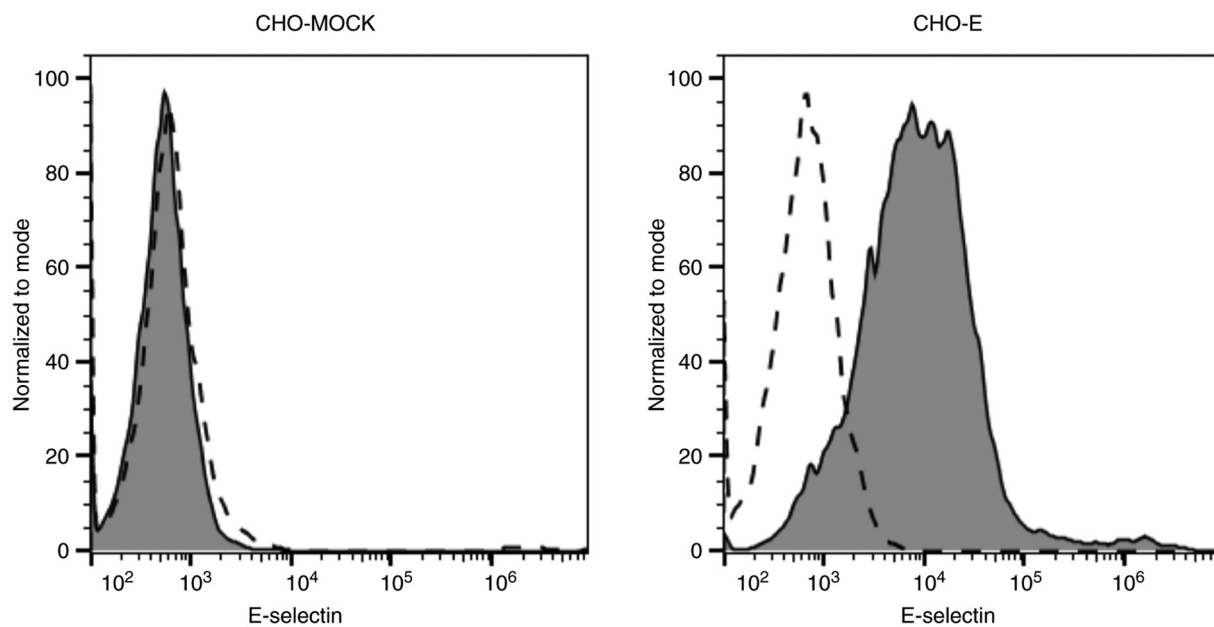

Table SI. Clinical features of the patients enrolled in the present study.

| Patient | Histological type <sup>a</sup> | Stage <sup>b</sup> | Gender | Age | Metastasis (location)   | 5-year survival (months) | Smoking habits <sup>c</sup> |
|---------|--------------------------------|--------------------|--------|-----|-------------------------|--------------------------|-----------------------------|
| 1       | AC                             | IA1                | F      | 83  | No                      | Alive                    | 0                           |
| 2       | AC                             | IIA                | M      | 66  | No                      | 29                       | 1                           |
| 3       | AC                             | IB                 | M      | 67  | No                      | Alive                    | 1                           |
| 4       | AC                             | IIIB               | M      | 60  | Yes (lung)              | 5                        | 1                           |
| 5       | SCC                            | IA3                | M      | 80  | No                      | Alive                    | 1                           |
| 6       | SCC                            | IA2                | F      | 59  | No                      | Alive                    | 1                           |
| 7       | AC                             | IB                 | M      | 65  | Yes (lung and bone)     | 26                       | 1                           |
| 8       | SCC                            | IB                 | M      | 64  | Yes (mediastinum, lung) | 15                       | 1                           |
| 9       | AC                             | IIIA               | F      | 67  | Yes (lung, bone)        | 50                       | 0                           |
| 10      | AC                             | IA3                | M      | 68  | No                      | Alive                    | 1                           |
| 11      | AC                             | IA2                | M      | 63  | Yes (lung, brain)       | 50                       | 1                           |
| 12      | AC                             | IIIA               | M      | 65  | Yes (lung)              | 33                       | 1                           |
| 13      | AC                             | IIIA               | F      | 64  | Yes (mediastinum, lung) | Alive                    | 0                           |
| 14      | AC                             | IA3                | F      | 71  | No                      | Alive                    | 0                           |
| 15      | AC                             | IIIA               | M      | 52  | Yes (bone)              | Alive                    | 0                           |
| 16      | SCC                            | IIIA               | M      | 49  | No                      | 12                       | 1                           |
| 17      | AC                             | IIIA               | M      | 48  | Yes (mediastinum, lung) | 44                       | 0                           |
| 18      | AC                             | IB                 | M      | 49  | Yes (lung)              | 26                       | 0                           |

<sup>a</sup>Histological type. <sup>b</sup>Stage according to 8th TNM classification. <sup>c</sup>0 represents a person that does not smoke, and 1 represents a person that smokes. AC, adenocarcinoma; SCC, squamous cell carcinoma.
